# Supplementary material
Source: PubMed Central journal article supplement (PMC5210238)
Supplement: 2016_154153-Disclosures_and_Contributions.pdf [file 2016_154153-Disclosures_and_Contributions.pdf]

Haematologica  
HAEMATOL/2016/154153  
Version 3

APO1, Alpha thalassemia, and BCL11A variants as a genetic risk profile for progression of chronic kidney disease in sickle cell anemia

Santosh L. Saraf, Binal N. Shah, Xu Zhang, Jin Han, Bamidele O. Tayo, Taimur Abbasi, Adam Ostrower, Elizabeth Guzman, Robert E. Molokie, Michel Gowhari, Johara Hassan, Shivi Jain, Richard S. Cooper, Roberto F. Machado, James P. Lash, and Victor R. Gordeuk

Disclosures: None

Contributions: S.L.S., B.S., and X.Z. designed and performed the research, analyzed the data, and wrote the paper. J.H., T.A., A.O., E.G., R.E.M., M.G., J.H., S.J. performed research and wrote the paper. B.T., R.S.C., R.F.M., and J.P.L. designed the research and wrote the paper. V.G.R. designed the research, analyzed the data, and wrote the paper.
